# Supplementary material
Source: publisher figshare collection journal article supplement (https://acs.figshare.com/ndownloader/files/17714354)
Supplement: Supplementary file 1 [file 17714354]

## Supporting Information

### **$T_g$ Confinement Effect of Random Copolymers of 4-*tert*-Butylstyrene and 4-Acetoxy styrene with Different Compositions**

Tong Wang,<sup>†</sup> Jinsong Yan,<sup>†</sup> Hailin Yuan,<sup>†</sup> Jianquan Xu,<sup>†</sup> Ho Yi Lam,<sup>‡</sup> Xuanji Yu,<sup>§</sup>

Chao Lv,<sup>//</sup> Binyang Du,<sup>//</sup> Ophelia K. C. Tsui\*,<sup>†</sup>

<sup>†</sup>*Department of Physics, Hong Kong University of Science and Technology, Clear Water Bay, Hong Kong*

<sup>‡</sup>*Department of Chemical and Biological Engineering, Hong Kong University of Science and Technology, Clear Water Bay, Hong Kong*

<sup>§</sup>*Division of Materials Science and Engineering, Boston University, Boston, Massachusetts 02215, United States*

<sup>//</sup>*Department of Polymer Science and Engineering, Zhejiang University, Hangzhou 310027, China*

\*Corresponding author: Email: [okctsui@ust.hk](mailto:okctsui@ust.hk)

### **Method to synthesize the P(TBS-*r*-AS) copolymers**

4-*tert*-butylstyrene (TBS, 90% purity) and 4-acetoxystyrene (AS, 98% purity) were purchased from J & K Scientific Ltd. and purified by chromatography with an alkaline alumina column (100-200 mesh particle size). Azobis(isobutyronitrile) (AIBN, 98% purity) was purchased from Aladdin Chemical Co., Ltd. and purified by recrystallization twice from methanol. 4-cyano-4-(thiobenzoylthio) pentanoic acid (CTA, > 97% purity, purchased from Sigma-Aldrich) was used as received. All other reagents, such as tetrahydrofuran (THF) and absolute methanol were of analytical grade and used as received.

P(TBS-*r*-AS) with different  $X_{\text{TBS}}$  from 0 to 1 were synthesized by reversible addition-fragmentation chain transfer (RAFT) polymerization. Typically, suitable amounts of TBS, AS, CTA and AIBN were sequentially added into an ampoule bottle of 50 mL in an N<sub>2</sub> environment. The mixture was degassed with three freezing-evacuation-thawing cycles. After sealing, the mixture was heated to 50 or 80 °C in an oil bath where polymerization took place. The reaction lasted for various amounts of time depending on the feeding of monomers, and was terminated by quenching with liquid N<sub>2</sub>. The reaction product was diluted with THF and precipitated with absolute methanol thrice. After drying at 50 °C under vacuum for 12 h, P(TBS-*r*-AS) copolymers in powder form resulted.

### **Method to prepare the substrates and polymer films**

Silicon covered by a native oxide (SiO<sub>x</sub>) layer was used as substrate for the films, and prepared as follows. Firstly, silicon wafers were sonicated in deionized water for 15 min, then

immersed in a piranha solution at 90 °C for 20 min to remove the organic contaminants. Afterward, the wafers were sonic rinsed in deionized water four times, 5 min each time. After rinsing and nitrogen-drying, the wafers were further cleaned by oxygen plasma for 20 min. Polymer films were prepared by spin-coating solutions of polymer in toluene with concentrations of 0.5-10.0 wt % onto cleaned substrates at a spinning speed of 4500 rpm. Afterward, the films were annealed at 150 °C under a vacuum of ~1 Pa for various times of 1, 5 or 9 h.
